# Supplementary material
Source: publisher figshare collection journal article supplement (https://diabetesjournals.figshare.com/ndownloader/files/26145005)
Supplement: Supplementary file 1 [file 26145005]

**Supplementary Table S1. Population characteristics derived from the Program ACTIVE II trial at 15 months after randomization and for the initiation of model simulation**

| Variable name and definition                         |                 |              | Trial-derived data |                  |                  |                  | Model-simulated data |                  |                  |                  |
|------------------------------------------------------|-----------------|--------------|--------------------|------------------|------------------|------------------|----------------------|------------------|------------------|------------------|
|                                                      |                 |              | UC                 | EXER             | CBT              | EXER+CB<br>T     | UC                   | EXER             | CBT              | EXER+CB<br>T     |
| Demographics                                         |                 |              |                    |                  |                  |                  |                      |                  |                  |                  |
| Age (years)                                          |                 | Mean<br>(SD) | 57.3<br>(10.7)     | 57.3<br>(10.7)   | 57.3<br>(10.7)   | 57.3 (10.7)      | 57.3<br>(10.7)       | 57.3<br>(11.2)   | 57.3<br>(10.6)   | 57.3 (10.6)      |
| Male                                                 |                 | %            | 23.6               | 23.6             | 23.6             | 23.6             | 23.6                 | 23.6             | 23.6             | 23.6             |
| Race                                                 | White           | %            | 70.7               | 70.7             | 70.7             | 70.7             | 70.7                 | 70.7             | 70.7             | 70.7             |
|                                                      | Black           | %            | 22.1               | 22.1             | 22.1             | 22.1             | 29.3                 | 29.3             | 29.3             | 29.3             |
|                                                      | Native American | %            | 1.4                | 1.4              | 1.4              | 1.4              | 0                    | 0                | 0                | 0                |
|                                                      | Multiple races  | %            | 1.4                | 1.4              | 1.4              | 1.4              | 0                    | 0                | 0                | 0                |
|                                                      | Unknown/refused | %            | 4.3                | 4.3              | 4.3              | 4.3              | 0                    | 0                | 0                | 0                |
| Duration of diabetes (years)                         |                 | Mean<br>(SD) | 13.1<br>(8.4)      | 13.1<br>(8.4)    | 13.1<br>(8.4)    | 13.1 (8.4)       | 13.3<br>(7.7)        | 13.1<br>(8.0)    | 13.3<br>(7.9)    | 13.3 (8.1)       |
| BMI (kg/m²)                                          |                 | Mean<br>(SD) | 36.7<br>(7.1)      | 36.7<br>(7.1)    | 36.7<br>(7.1)    | 36.7 (7.1)       | 36.6<br>(7.0)        | 36.6<br>(7.0)    | 36.6<br>(7.2)    | 36.6 (7.3)       |
| Risk factors and health utilities                    |                 |              |                    |                  |                  |                  |                      |                  |                  |                  |
| HbA1c (%)                                            |                 | Mean<br>(SD) | 7.90<br>(1.7)      | 7.83<br>(1.6)    | 7.78<br>(1.9)    | 7.48 (1.1)       | 7.91<br>(1.8)        | 7.83<br>(1.66)   | 7.76<br>(1.93)   | 7.50 (1.1)       |
| Total cholesterol (mmol/L)                           |                 | Mean<br>(SD) | 5.19<br>(1.45)     | 4.73<br>(1.11)   | 5.00<br>(1.00)   | 4.84 (0.59)      | 5.19<br>(1.45)       | 4.73<br>(1.10)   | 5.00<br>(0.98)   | 4.84 (0.59)      |
| HDL cholesterol (mmol/L)                             |                 | Mean<br>(SD) | 1.22<br>(0.30)     | 1.06<br>(0.23)   | 1.17<br>(0.30)   | 1.19 (0.27)      | 1.22<br>(0.30)       | 1.06<br>(0.23)   | 1.17<br>(0.29)   | 1.19 (0.27)      |
| LDL cholesterol (mmol/L)                             |                 | Mean<br>(SD) | 2.81<br>(0.77)     | 2.55<br>(0.88)   | 2.57<br>(1.00)   | 2.58 (0.67)      | 2.81<br>(0.77)       | 2.55<br>(0.87)   | 2.57<br>(0.98)   | 2.58 (0.63)      |
| Triglycerides (mmol/L)                               |                 | Mean<br>(SD) | 1.95<br>(2.22)     | 2.04<br>(1.06)   | 2.13<br>(2.25)   | 1.88 (0.53)      | 1.95<br>(2.21)       | 2.03<br>(1.03)   | 2.12<br>(2.08)   | 1.88 (0.50)      |
| SBP (mmHg)                                           |                 | Mean<br>(SD) | 127.1<br>(14.7)    | 125.3<br>(13.4)  | 130.3<br>(19.0)  | 132.3 (12.3)     | 127.3<br>(14.7)      | 125.3<br>(13.5)  | 130.3<br>(19.3)  | 132.3 (12.3)     |
| DBP (mmHg)                                           |                 | Mean<br>(SD) | 76.4<br>(8.8)      | 76.4<br>(8.8)    | 76.4<br>(8.8)    | 76.4 (8.8)       | 76.5<br>(7.8)        | 76.4<br>(7.9)    | 76.4<br>(8.0)    | 76.4 (7.8)       |
| Current smoker                                       |                 | %            | 8.6                | 8.6              | 8.6              | 8.6              | 8.6                  | 8.6              | 8.6              | 8.6              |
| History of atrial fibrillation                       |                 | %            | 24.3               | 24.3             | 24.3             | 24.3             | 24.3                 | 24.3             | 24.3             | 24.3             |
| Health utility (SF-12)                               |                 | Mean<br>(SD) | 0.606<br>(0.117)   | 0.654<br>(0.114) | 0.643<br>(0.121) | 0.694<br>(0.148) | 0.606<br>(0.117)     | 0.654<br>(0.114) | 0.643<br>(0.121) | 0.694<br>(0.148) |
| Disease status                                       |                 |              |                    |                  |                  |                  |                      |                  |                  |                  |
| History of angina                                    |                 | %            | 18.6               | 18.6             | 18.6             | 18.6             | 18.6                 | 18.6             | 18.6             | 18.6             |
| History of heart failure with no MI                  |                 | %            | 1.4                | 1.4              | 1.4              | 1.4              | 1.4                  | 1.4              | 1.4              | 1.4              |
| History of revascularization procedure (CABG or PCI) |                 | %            | 3.6                | 3.6              | 3.6              | 3.6              | 3.6                  | 3.6              | 3.6              | 3.6              |

|                                                           |   |      |      |      |      |      |      |      |      |
|-----------------------------------------------------------|---|------|------|------|------|------|------|------|------|
| with no MI                                                |   |      |      |      |      |      |      |      |      |
| History of MI with no heart failure                       | % | 6.4  | 6.4  | 6.4  | 6.4  | 6.4  | 6.4  | 6.4  | 6.4  |
| History of MI and heart failure                           | % | 0    | 0    | 0    | 0    | 0    | 0    | 0    | 0    |
| History of stroke                                         | % | 0.7  | 0.7  | 0.7  | 0.7  | 0.7  | 0.7  | 0.7  | 0.7  |
| Microalbuminuria (30 mg/g $\leq$ UACR < 300 mg/g)         | % | 0.7  | 0.7  | 0.7  | 0.7  | 0.7  | 0.7  | 0.7  | 0.7  |
| Proteinuria (UACR $\geq$ 300 mg/g)                        | % | 6.4  | 6.4  | 6.4  | 6.4  | 6.4  | 6.4  | 6.4  | 6.4  |
| ESRD – dialysis                                           | % | 1.4  | 1.4  | 1.4  | 1.4  | 1.4  | 1.4  | 1.4  | 1.4  |
| ESRD – transplant                                         | % | 0    | 0    | 0    | 0    | 0    | 0    | 0    | 0    |
| Clinical neuropathy                                       | % | 40.0 | 40.0 | 40.0 | 40.0 | 40.0 | 40.0 | 40.0 | 40.0 |
| Amputation due to diabetic neuropathy                     | % | 0.7  | 0.7  | 0.7  | 0.7  | 0.7  | 0.7  | 0.7  | 0.7  |
| Non-proliferative retinopathy (left eye)                  | % | 6.4  | 6.4  | 6.4  | 6.4  | 6.4  | 6.4  | 6.4  | 6.4  |
| Proliferative retinopathy or macular edema (left eye)     | % | 5.0  | 5.0  | 5.0  | 5.0  | 5.0  | 5.0  | 5.0  | 5.0  |
| Blindness (left eye)                                      | % | 11.4 | 11.4 | 11.4 | 11.4 | 11.4 | 11.4 | 11.4 | 11.4 |
| Non-proliferative retinopathy (right eye)                 | % | 6.4  | 6.4  | 6.4  | 6.4  | 6.4  | 6.4  | 6.4  | 6.4  |
| Proliferative retinopathy or macular edema (right eye)    | % | 5.0  | 5.0  | 5.0  | 5.0  | 5.0  | 5.0  | 5.0  | 5.0  |
| Blindness (right eye)                                     | % | 11.4 | 11.4 | 11.4 | 11.4 | 11.4 | 11.4 | 11.4 | 11.4 |
| Medications                                               |   |      |      |      |      |      |      |      |      |
| Diet and exercise only                                    | % | 6.4  | 6.4  | 6.4  | 6.4  | 6.4  | 6.4  | 6.4  | 6.4  |
| Single non-insulin med (e.g., metformin only)             | % | 32.1 | 32.1 | 32.1 | 32.1 | 32.1 | 32.1 | 32.1 | 32.1 |
| Two or more non-insulin meds                              | % | 24.4 | 24.4 | 24.4 | 24.4 | 24.4 | 24.4 | 24.4 | 24.4 |
| Basal insulin only (basal insulin or NPH)                 | % | 15.4 | 15.4 | 15.4 | 15.4 | 15.4 | 15.4 | 15.4 | 15.4 |
| Intensive bolus insulin                                   | % | 21.8 | 21.8 | 21.8 | 21.8 | 21.8 | 21.8 | 21.8 | 21.8 |
| Beta-blocker (whether a subject is taking beta-blocker)   | % | 29.5 | 29.5 | 29.5 | 29.5 | 30.0 | 29.3 | 30.0 | 30.0 |
| ACE inhibitor (whether a subject is taking ACE inhibitor) | % | 51.9 | 51.9 | 51.9 | 51.9 | 52.3 | 52.2 | 52.2 | 52.3 |
| Statin (whether a subject is taking statin)               | % | 29.5 | 29.5 | 29.5 | 29.5 | 30.0 | 29.3 | 30.0 | 30.0 |
| Aspirin (whether a subject is taking aspirin)             | % | 30.8 | 30.8 | 30.8 | 30.8 | 30.5 | 30.5 | 30.5 | 30.5 |

Abbreviations: UC, usual care; EXER, exercise; CBT, cognitive behavioral therapy; SD, standard deviation; BMI, body mass index; HbA1c, glycated hemoglobin; HDL, high density lipoprotein; LDL, low density lipoprotein; SBP, systolic blood pressure; DBP, diastolic blood pressure; SF-12, 12-item short form health survey; MI, myocardial infarction; CABG, coronary artery bypass grafting; PCI, percutaneous coronary intervention; UACR, urine albumin-to-creatinine ratio; ESRD, end-stage renal disease; NPH, neutral protamine Hagedorn; ACE, angiotensin-converting enzyme.

**Supplementary Table S2. Intervention-related costs over the 15-month study period in the Program ACTIVE II trial**

| Cost component                                                                                          | Per-participant cost (2014 US\$) |                |                |                |
|---------------------------------------------------------------------------------------------------------|----------------------------------|----------------|----------------|----------------|
|                                                                                                         | UC                               | EXER           | CBT            | EXER+CBT       |
| <b>Formal healthcare sector</b>                                                                         |                                  |                |                |                |
| PA2 intervention (resource utilization and cost incurred by the PA2 interventions)                      |                                  |                |                |                |
| CBT intervention                                                                                        |                                  |                |                |                |
| Cost of training CBT therapists (including time and material costs) <sup>1</sup>                        | NA                               | NA             | NC             | NC             |
| Cost of time that CBT therapists spent on interventions <sup>2</sup>                                    | NA                               | NA             | 694.3          | 738.4          |
| Cost of time that CBT therapists spent on remote communications for health counseling <sup>3</sup>      | NA                               | NA             | DU             | DU             |
| EXER intervention                                                                                       |                                  |                |                |                |
| Cost of training exercise trainers (including time and material costs) <sup>4</sup>                     | NA                               | None           | NA             | None           |
| Cost of time that exercise trainers spent on interventions <sup>5</sup>                                 | NA                               | 190.8          | NA             | 165.2          |
| Cost of passes/memberships to fitness facilities <sup>6</sup>                                           | NA                               | 129.0          | NA             | 129.0          |
| Cost of time that exercise trainers spent on remote communications for health counseling <sup>3</sup>   | NA                               | DU             | NA             | DU             |
| <i>Sub-total cost of the PA2 interventions</i>                                                          | <i>0</i>                         | <i>319.8</i>   | <i>694.3</i>   | <i>1,032.6</i> |
| Resource utilization and cost of medical care outside the PA2 <sup>7</sup>                              | 1,615.2                          | 1,026.0        | 1,062.7        | 703.7          |
| <i>Sub-total cost of the PA2 interventions and resource utilization of medical care outside the PA2</i> | <i>1,615.2</i>                   | <i>1,345.8</i> | <i>1,757.0</i> | <i>1,736.3</i> |
| <b>Informal healthcare sector</b>                                                                       |                                  |                |                |                |
| Participant time                                                                                        |                                  |                |                |                |
| Cost of time spent on participation in CBT sessions <sup>8</sup>                                        | NA                               | NA             | 226.0          | 240.3          |
| Cost of time spent on participation in EXER sessions <sup>9</sup>                                       | NA                               | 186.5          | NA             | 161.4          |
| <i>Sub-total cost of participant time spent on participation in intervention sessions</i>               | <i>0</i>                         | <i>186.5</i>   | <i>226.0</i>   | <i>401.7</i>   |
| <b>Total cost</b>                                                                                       | <b>1,615.2</b>                   | <b>1,532.3</b> | <b>1,983.0</b> | <b>2,138.0</b> |

Abbreviations: PA2, Program ACTIVE II; UC, usual care; EXER, exercise; CBT, cognitive behavioral therapy; NA, not applicable; NC, not considered; DU, data unavailable.

<sup>1</sup>Each CBT therapist was paid for the 6-hour training. However, the per-participant fixed start-up cost for training CBT therapists in the PA2 could vary extensively by the number of participants enrolled in the PA2 for CBT therapists' interventions. Moreover, considering 1) CBT therapists would probably give interventions to more participants in a real-world practice than they did in the PA2, 2) CBT therapists who were partnered with the PA2 were already available to the public, and 3) CBT therapists were well qualified and trained, we would assume that the PA2 is an ongoing program and thus we would not consider the fixed start-up cost for training CBT therapists in the base-case cost-effectiveness analysis.

<sup>2</sup>CBT therapists were paid at the hourly rate of \$70 for 90 minutes per CBT session, and it was inflated to the hourly rate of \$73.4 in year 2014 cost. Thus, it was \$110.2 in year 2014 cost for 90 minutes per CBT session. On average, a CBT participant and a CBT+EXER participant attended 6.3 and 6.7 CBT sessions, respectively, over the 12-week intervention period.

<sup>3</sup>Remote communications may include phone calls, e-mails, or other electronic communications (e.g., text messages, portal messages, etc.), or mails.

<sup>4</sup>Exercise trainers have already worked in the fitness facilities that were partnered with the PA2, and thus there would be no cost of training exercise trainers.

<sup>5</sup>Exercise trainers were paid at the hourly rate of \$35 for a 60-minute exercise session, and it was inflated to \$36.7 in year 2014 cost per exercise session. On average, an EXER participant and a CBT+EXER participant attended 5.2 and 4.5 exercise sessions, respectively, over the 12-week intervention period.

<sup>6</sup>The cost of passes/memberships to fitness facilities was \$123 per participant, and it was inflated to \$129.0 in year 2014 cost.

<sup>7</sup>To estimate the resource utilization and cost of medical care outside the PA2, we surveyed participants and estimated the cost of using outpatient, urgent care, emergency room, and hospitalization services, and laboratory testing, and self-monitoring of blood glucose.

<sup>8</sup>The total participant time spent on participating in CBT sessions with CBT therapists in the PA2 trial was 6.3 hours (6.3 sessions x 60 minutes/session) and 6.7 hours (6.7 sessions x 60 minutes/session) for the CBT and CBT+EXER group, respectively. Based on year 2014 data from the US Bureau of Labor Statistics (<https://www.bls.gov/bls/blswage.htm>), these times were valued using the US nonfarm workers with a total hourly rate of \$35.87, consisting of the hourly wage of \$24.57 plus the fringe benefits of \$11.30 (fringe rate: 46%).

<sup>9</sup>The total participant time spent on participating in EXER sessions with exercise trainers in the PA2 trial was 5.2 hours (5.2 sessions x 60 minutes/session) and 4.5 hours (4.5 sessions x 60 minutes/session) for the EXER and CBT+EXER group, respectively. Based on year 2014 data from the US Bureau of Labor Statistics (<https://www.bls.gov/bls/blswage.htm>), these times were valued using the US nonfarm workers with a total hourly rate of \$35.87, consisting of the hourly wage of \$24.57 plus the fringe benefits of \$11.30 (fringe rate: 46%).

**Supplementary Table S3. Impact inventory for components considered in the cost-effectiveness analyses**

| Type of impact                         | Included in the reference case analysis from each perspective |               | Notes on sources of evidence                                                                        |
|----------------------------------------|---------------------------------------------------------------|---------------|-----------------------------------------------------------------------------------------------------|
|                                        | Healthcare sector                                             | Societal      |                                                                                                     |
| <b>Formal healthcare sector</b>        |                                                               |               |                                                                                                     |
| Health                                 |                                                               |               |                                                                                                     |
| Health outcomes (effects)              |                                                               |               |                                                                                                     |
| Longevity effects                      | Yes                                                           | Yes           | Program ACTIVE II trial, MMD                                                                        |
| Health-related quality-of-life effects | Yes                                                           | Yes           | Program ACTIVE II trial (utilities derived from SF-12), MMD (utilities from published literature)   |
| Other health effects                   | No                                                            | No            |                                                                                                     |
| Medical costs                          |                                                               |               |                                                                                                     |
| Paid for by third-party payers         | Yes                                                           | Yes           | Program ACTIVE II trial (intervention-related costs), MMD (outcome costs from published literature) |
| Paid for by patients out-of-pocket     | Not available                                                 | Not available |                                                                                                     |
| Future related medical costs           | Yes                                                           | Yes           | MMD (outcome costs from published literature)                                                       |
| Future unrelated medical costs         | Not available                                                 | Not available |                                                                                                     |
| <b>Informal healthcare sector</b>      |                                                               |               |                                                                                                     |
| Health                                 |                                                               |               |                                                                                                     |
| Patient-time costs                     | Not applicable                                                | Yes           | Program ACTIVE II trial                                                                             |
| Unpaid caregiver-time costs            | Not applicable                                                | Not available |                                                                                                     |
| Transportation costs                   | Not applicable                                                | Not available |                                                                                                     |
| <b>Non-healthcare sectors</b>          |                                                               |               |                                                                                                     |
| Productivity                           | Not applicable                                                | Not available |                                                                                                     |
| Consumption                            | Not applicable                                                | Not available |                                                                                                     |
| Social services                        | Not applicable                                                | Not available |                                                                                                     |
| Legal or criminal justice              | Not applicable                                                | Not available |                                                                                                     |
| Education                              | Not applicable                                                | Not available |                                                                                                     |
| Housing                                | Not applicable                                                | Not available |                                                                                                     |
| Environment                            | Not applicable                                                | Not available |                                                                                                     |

Abbreviations: MMD, Michigan Model for Diabetes; SF-12, 12-item short form health survey.

**Supplementary Table S4. Base-case and sensitivity analyses for cost-effectiveness of the EXER and EXER+CBT interventions vs. the CBT intervention, and of the EXER+CBT intervention vs. the EXER intervention**

|                                                                                                                                                                        | EXER vs. CBT               |                  |             | EXER+CBT vs. CBT           |                  |             | EXER+CBT vs. EXER          |                  |             |
|------------------------------------------------------------------------------------------------------------------------------------------------------------------------|----------------------------|------------------|-------------|----------------------------|------------------|-------------|----------------------------|------------------|-------------|
|                                                                                                                                                                        | Incremental total cost, \$ | Incremental QALY | ICER, \$    | Incremental total cost, \$ | Incremental QALY | ICER, \$    | Incremental total cost, \$ | Incremental QALY | ICER, \$    |
| Base-case analysis <sup>1</sup>                                                                                                                                        | -908                       | 0.092            | Cost-saving | -192                       | 0.401            | Cost-saving | 716                        | 0.308            | 2,323       |
| Perspective                                                                                                                                                            |                            |                  |             |                            |                  |             |                            |                  |             |
| Societal perspective                                                                                                                                                   | -948                       | 0.092            | Cost-saving | -16.7                      | 0.401            | Cost-saving | 931                        | 0.308            | 3,021       |
| Time horizon                                                                                                                                                           |                            |                  |             |                            |                  |             |                            |                  |             |
| 5-year simulation time horizon                                                                                                                                         | -813                       | 0.051            | Cost-saving | -207                       | 0.224            | Cost-saving | 605                        | 0.173            | 3,496       |
| Effectiveness                                                                                                                                                          |                            |                  |             |                            |                  |             |                            |                  |             |
| Persistent intervention effects                                                                                                                                        | -1,561                     | 0.098            | Cost-saving | -5,645                     | 0.426            | Cost-saving | -4,084                     | 0.328            | Cost-saving |
| Cost                                                                                                                                                                   |                            |                  |             |                            |                  |             |                            |                  |             |
| 400% increase of the cost for passes/memberships to fitness facilities <sup>2</sup>                                                                                    | -392                       | 0.092            | Cost-saving | 324                        | 0.401            | 808         | 716                        | 0.308            | 2,323       |
| 50% increase of the hourly rate for CBT therapists                                                                                                                     | -1,255                     | 0.092            | Cost-saving | -170                       | 0.401            | Cost-saving | 1,085                      | 0.308            | 3,520       |
| 50% increase of the hourly rate for exercise trainers                                                                                                                  | -813                       | 0.092            | Cost-saving | -110                       | 0.401            | Cost-saving | 703                        | 0.308            | 2,281       |
| 400% increase of the cost for passes/memberships to fitness facilities, <sup>2</sup> and 50% increase of the hourly rate for both CBT therapists and exercise trainers | -644                       | 0.092            | Cost-saving | 428                        | 0.401            | 1,070       | 1,072                      | 0.308            | 3,478       |

Abbreviations: EXER, exercise; CBT, cognitive behavioral therapy; QALY, quality-adjusted life year; ICER, incremental cost-effectiveness ratio.

<sup>1</sup>The base-case analysis was from the healthcare sector perspective over a 10-year simulation time horizon for the cost-effectiveness of the Program ACTIVE II interventions assuming the diminishing intervention effects after the end of the trial.

<sup>2</sup>The cost of passes/memberships to fitness facilities was assumed to increase by 400%, which would provide participants with free access to fitness facilities for the first 3 months of the study period (\$129 per participant in the base-case analysis) versus for the total 15 months of the study period (\$645 per participant in the sensitivity analysis).
